# Supplementary material for: Using thermal analysis coupled to isotope dilution cold vapor ICP-MS in the quantification of atmospheric particulate phase mercury
Source: Royal Society of Chemistry journal article supplement (doi:10.1039/c3ja50184a), 2013-01-01
Supplement: c3ja50184a.pdf [file c3ja50184a.pdf]

## 1 Supplementary Material

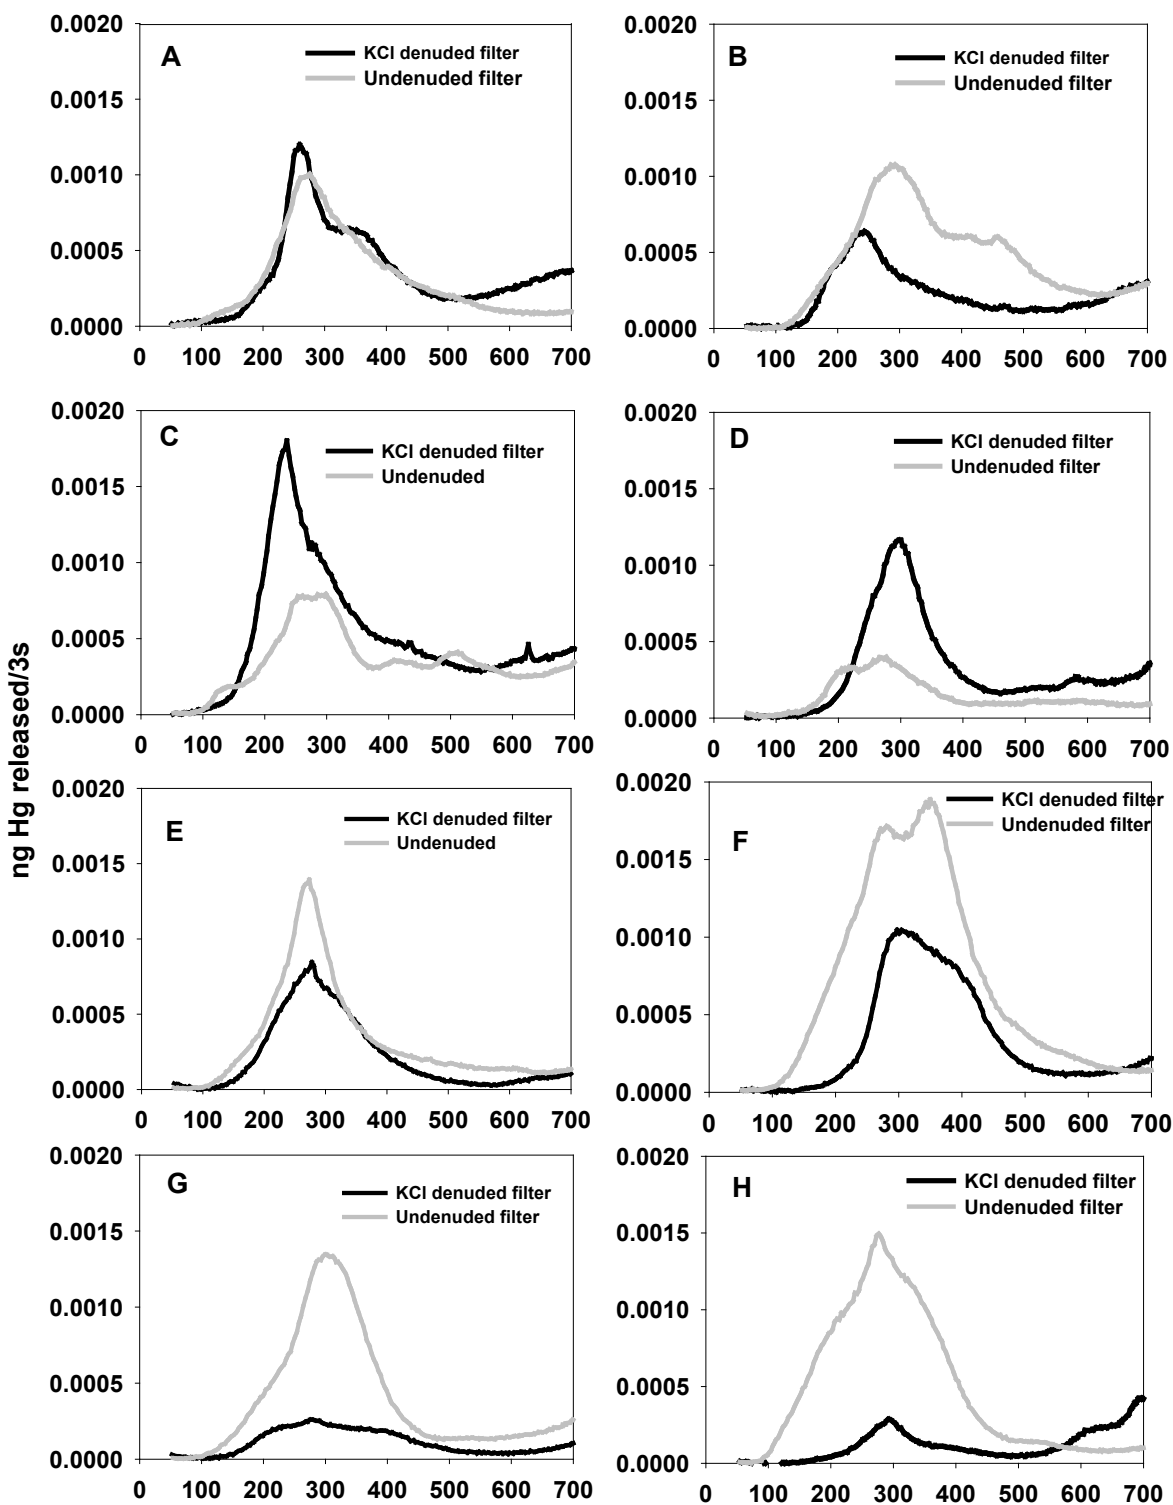

2  
3 Figure S1 Mercury release, ng/3s versus temperature, for denuded and undenuded fine particulate  
4 mercury samples collected in Detroit, MI
